# Supplementary material for: The mechanism of manganese dissolution on Li1.6Mn1.6O4 ion sieves with HCl
Source: Royal Society of Chemistry journal article supplement (doi:10.1039/c8dt00033f), 2018-01-01
Supplement: c8dt00033f1.pdf [file c8dt00033f1.pdf]

## <Supporting information>

# Mechanism of manganese dissolution on $\text{Li}_{1.6}\text{Mn}_{1.6}\text{O}_4$ ion sieves with HCl

Aolei Gao<sup>ab</sup>, Zhenhua Sun<sup>a</sup>, Shaopeng Li<sup>\*a</sup>, Xinjuan Hou<sup>ab</sup>, Huiquan Li<sup>\*ab</sup>,  
Qisheng Wu<sup>c</sup>, and Xinguo Xi<sup>c</sup>

<sup>a</sup>CAS Key Laboratory of Green Process and Engineering, National Engineering Laboratory  
for Hydrometallurgical Cleaner Production Technology, Institute of Process Engineering,  
Chinese Academy of Sciences, Beijing 100090, China

<sup>b</sup>University of Chinese Academy of Sciences, Beijing 100049, China

<sup>c</sup>Yancheng Institute of Technology, Jiangsu 224051, China

E-mails of corresponding authors: [hqli@ipe.ac.cn](mailto:hqli@ipe.ac.cn), [shpli@ipe.ac.cn](mailto:shpli@ipe.ac.cn)

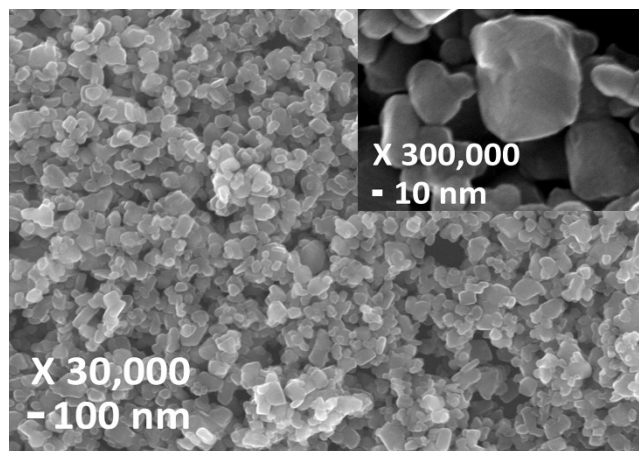

**Fig. 1** SEM images of as-prepared  $\text{Li}_{1.6}\text{Mn}_{1.6}\text{O}_4$  at 15 kV under 30,000 and 300,000 $\times$  magnification.
